# Supplementary material for: Lung Adenocarcinoma Cell Sensitivity to Chemotherapies: A Spotlight on Lipid Droplets and SREBF1 Gene
Source: MDPI journal article supplement (doi:10.3390/cancers14184454), 2022-09-14
Supplement: s1 [file s1]

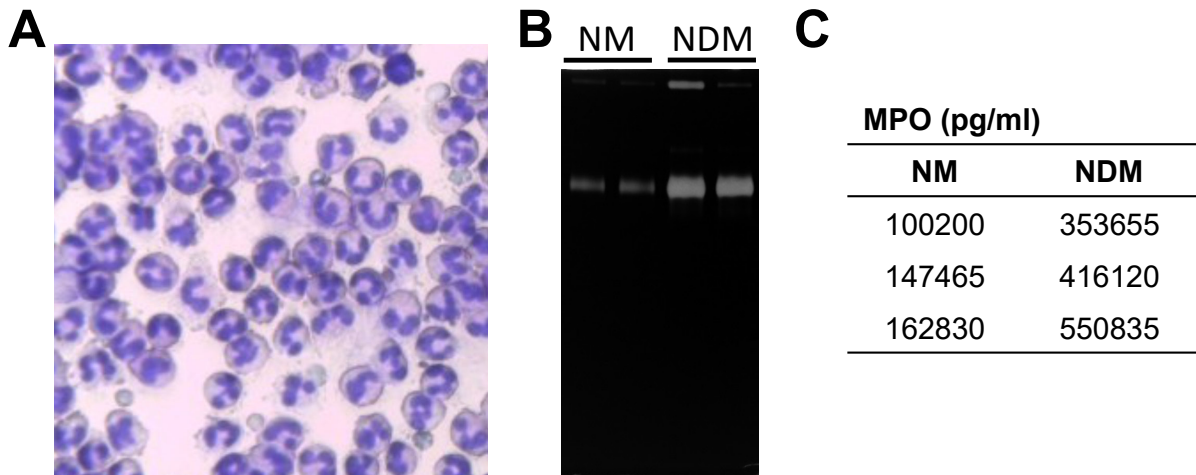

**Supplementary Figure S1: Neutrophil isolation and degranulation.** **A** A representative cytopsin stained with May-Grünwald and Giemsa. **B** Characterization of neutrophil degranulation by increased protease activity in neutrophil degranulation medium (NDM) as compared to non-degranulated neutrophil medium (NM) on 10% Zymogram gels. One representative gel out of 10 is shown. **C** Increased levels of myeloperoxidase (MPO, pg/ml) in NDM compared to NM as measured by ELISA. Data are shown from three representative experiments out of 30.

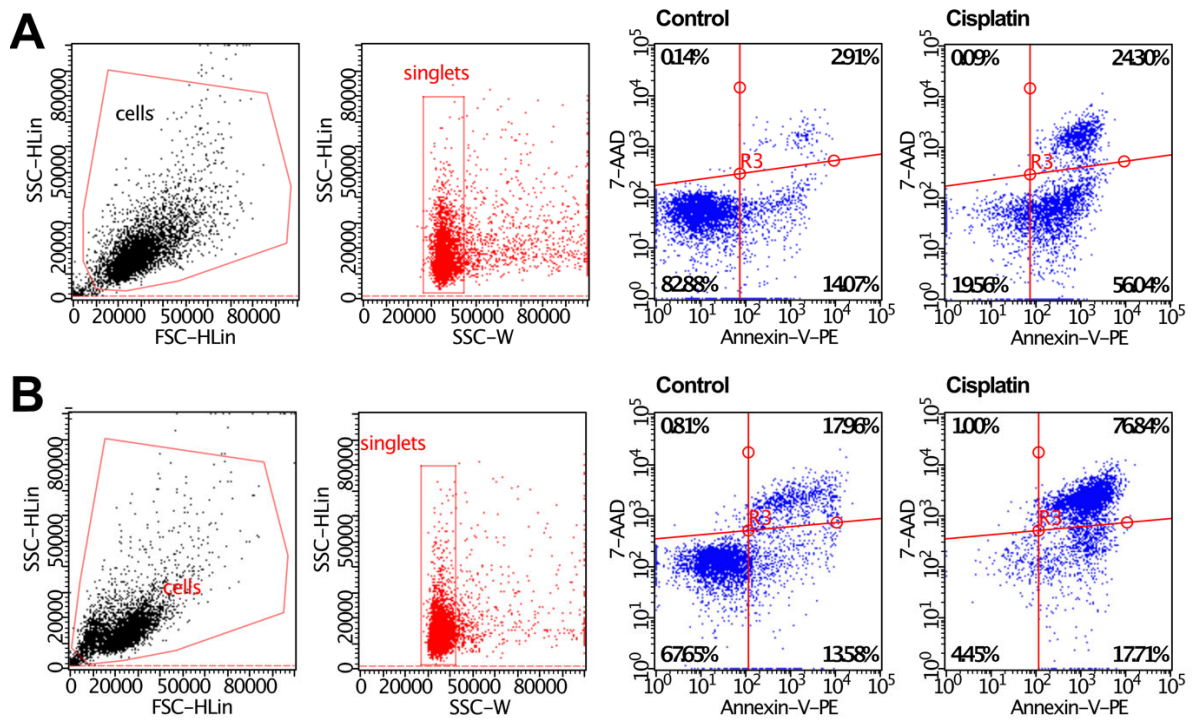

**Supplementary Figure S2: Representative analysis of the viability of H1299 (A) and H1563 (B) cells in different media.** H1299 and H1563 cells were cultured for 48 h in the presence or absence of 20  $\mu\text{g/ml}$  cisplatin in basal medium. PE Annexin V apoptosis detection assay was used for flow cytometry to measure cell death. Unstained cells in the bottom left quadrant were classified as “living”.

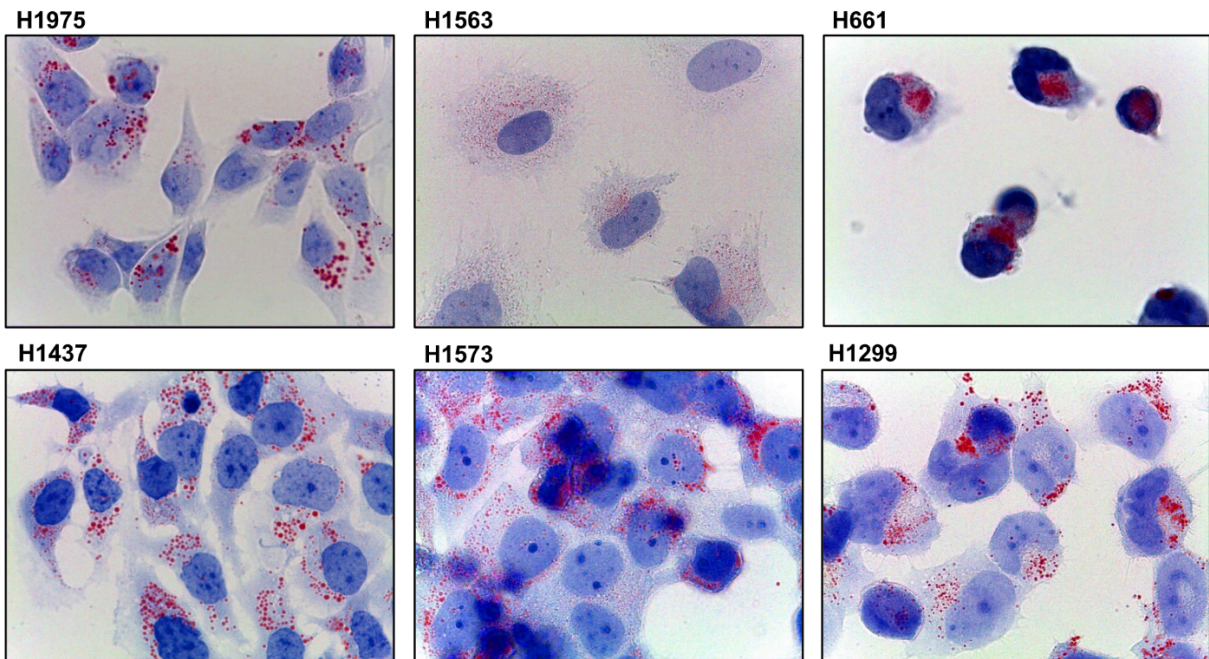

**Supplementary Figure S3: Lipid droplet formation in six lung cancer cell lines after treatment with 20 µg/ml cisplatin.** Cells were stained for lipid droplets with Oil red O and for nuclear components with hematoxylin after culture for 48 h in basal medium. Images were taken at 1000-fold magnification using 100x oil immersion objective (Leica). One representative experiment out of three independent experiments is shown.

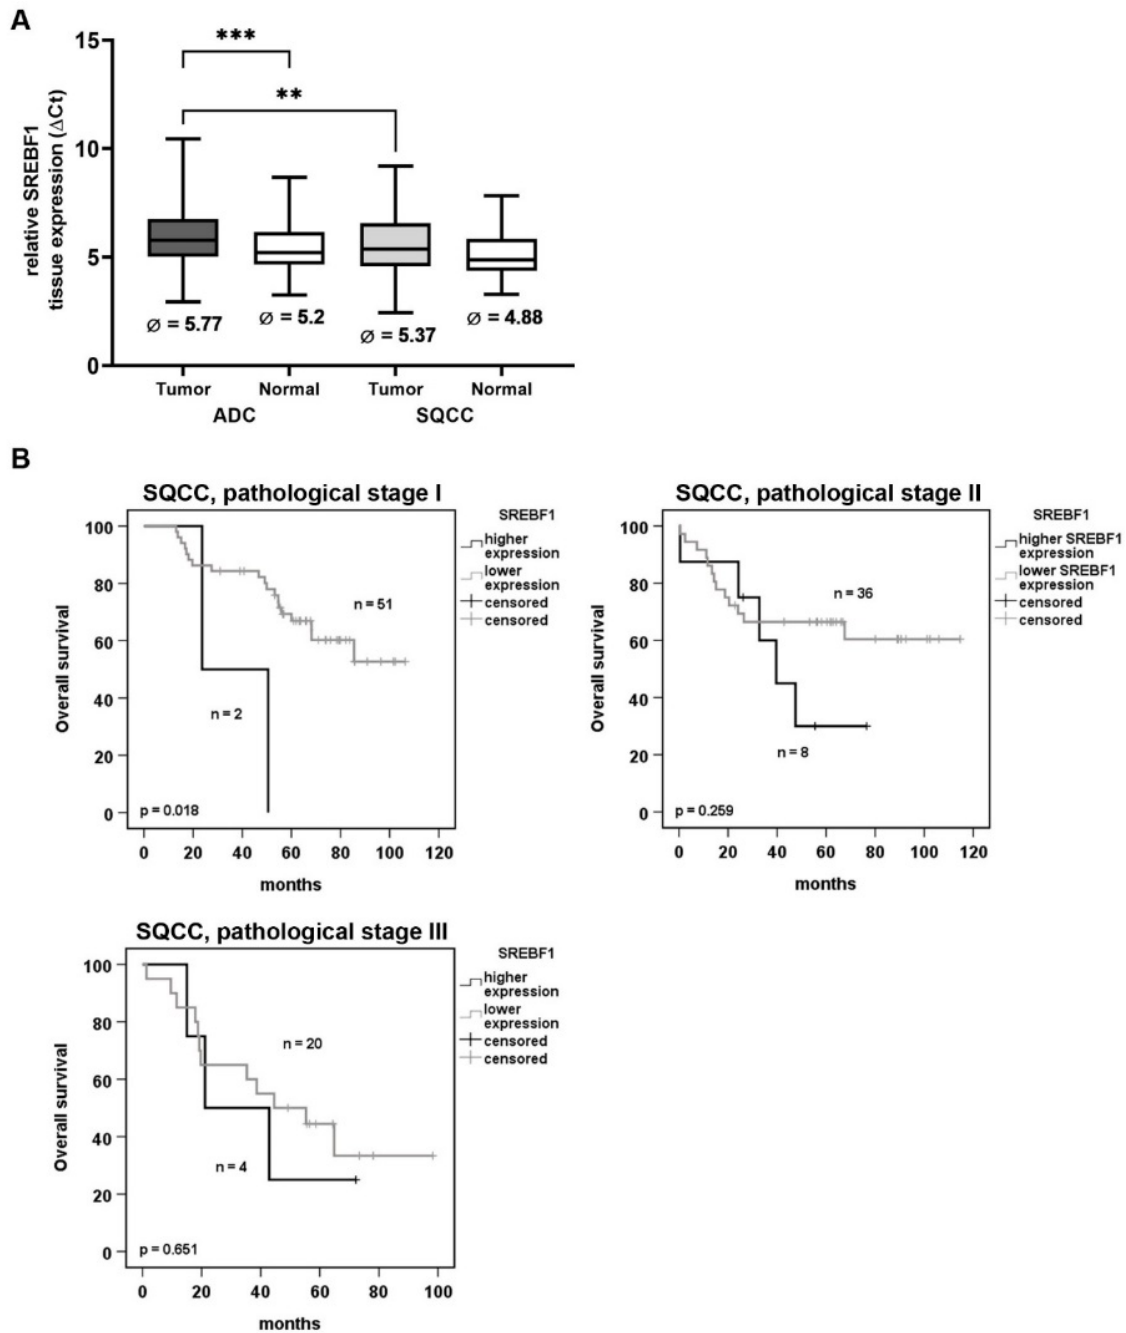

**Supplementary Figure S4:** *SREBF1* expression in ADC and SQCC and overall survival for SQCC. **A** Relative *SREBF1* expression in tumor and adjacent lung tissue. Gene expression was normalized with two housekeeping genes (*ESD* and *RPS18*). Please note that higher values mean a lower gene expression. **B** Kaplan-Meier survival curves of *SREBF1* tumor expression in SQCC. Cut-off for separation of the groups was the same as used in Fig. 5C. SQCC = squamous cell carcinoma,  $\emptyset$  = median, \* $p < 0.05$ , \*\* $p < 0.005$

| <b>Supplementary Table S1. Cohort description</b>          |            |            |
|------------------------------------------------------------|------------|------------|
| <b>Parameter</b>                                           | <b>n</b>   | <b>(%)</b> |
| Median Age                                                 | 65 (38–88) |            |
| <b>Total</b>                                               | <b>292</b> | <b>100</b> |
| Male                                                       | 205        | 70         |
| Female                                                     | 87         | 30         |
| <b>Histology</b>                                           |            |            |
| Adeno                                                      | 171        | 59         |
| Squamous                                                   | 121        | 41         |
| <b>Therapy</b>                                             |            |            |
| OP                                                         | 179        | 63         |
| OP/RT                                                      | 7          | 2          |
| OP/ChT                                                     | 76         | 26         |
| OP/RT/ChT                                                  | 30         | 10         |
| <b>Smoking status</b>                                      |            |            |
| Non-Smoker                                                 | 26         | 9          |
| Ex-Smoker                                                  | 162        | 55         |
| Smoker                                                     | 102        | 35         |
| No data                                                    | 2          | 1          |
| <b>Pathological Stage<br/>(7<sup>th</sup> TNM edition)</b> |            |            |
| IA                                                         | 33         | 11         |
| IB                                                         | 108        | 37         |
| IIA                                                        | 21         | 7          |
| IIB                                                        | 62         | 21         |
| IIIA                                                       | 63         | 21         |
| IIIB                                                       | 5          | 2          |
| <b>ECOG</b>                                                |            |            |
| 0                                                          | 251        | 86         |
| 1                                                          | 39         | 13         |
| 2                                                          | 2          | 1          |

OP: operation, RT: radiotherapy, ChT: chemotherapy, ECOG: Eastern Cooperative Oncology Group Performance Status Scale

| <b>Supplementary Table S2. Cox Regression Analyzes</b>                     |                     |                               |
|----------------------------------------------------------------------------|---------------------|-------------------------------|
| <b>Univariate Analysis</b><br>(Gene Expression, overall survival)          |                     |                               |
| <b>Variable (high vs. low)</b>                                             | <b>Significance</b> | <b>Hazard Ratio (95 % CI)</b> |
| <i>SREBF1</i> (ADC)                                                        | <b>0.039</b>        | <b>1.675 (1.20-2.751)</b>     |
| <i>SREBF1</i> (SQCC)                                                       | <b>0.015</b>        | <b>2.305 (1.15-4.619)</b>     |
| <b>Multivariate Analysis (SQCC)</b><br>(Gene Expression, Overall Survival) |                     |                               |
| <b>Variable</b>                                                            | <b>Significance</b> | <b>Hazard Ratio (95 % CI)</b> |
| <i>SREBF1</i> (tumor, high vs. low)                                        | <b>0.012</b>        | <b>2.571 (1.236-5.348)</b>    |
| Age                                                                        | <b>0.007</b>        | <b>1.05 (1.014-1.088)</b>     |
| Gender (female vs. male)                                                   | <b>0.025</b>        | <b>0.261 (0.08-0.847)</b>     |
| pathological stage (7 <sup>th</sup> edition)                               | 0.097               | 1.369 (0.944-1.984)           |
| Smoking status                                                             | 0.265               | 1.371 (0.787-2.389)           |
| ECOG                                                                       | 0.569               | 1.251 (0.579-2.7)             |
| <b>Multivariate Analysis (ADC)</b><br>(Gene Expression, Overall Survival)  |                     |                               |
| <b>Variable</b>                                                            | <b>Significance</b> | <b>Hazard Ratio (95 % CI)</b> |
| <i>SREBF1</i> (tumor, high vs. low)                                        | 0.527               | 1.188 (0.697-2.024)           |
| Age                                                                        | <b>0.006</b>        | <b>1.04 (1.011-1.07)</b>      |
| Gender (female vs. male)                                                   | 0.18                | 0.709 (0.429-1.172)           |
| pathological stage (7 <sup>th</sup> edition)                               | <b>&lt;0.001</b>    | <b>1.998 (1.498-2.679)</b>    |
| Smoking status                                                             | <b>0.047</b>        | <b>1.262 (1.003-1.587)</b>    |
| ECOG                                                                       | 0.99                | 1.004 (0.546-1.846)           |

ADC: adenocarcinoma, SQCC: squamous cell carcinoma, CI: confidence interval, ECOG: Eastern Cooperative Oncology Group Performance Status Scale
